# Supplementary material
Source: PubMed Central journal article supplement (PMC5553036)
Supplement: JB.00359-17_zjb017174509s1.pdf [file JB.00359-17_zjb017174509s1.pdf]

## - Supplemental material -

A key enzyme of NAD<sup>+</sup> salvage pathway in *Thermus thermophilus*: Characterization of nicotinamidase and the impact of its gene deletion at high temperatures

Hironori Taniguchi<sup>1</sup>, Sathidaphorn Sungwallek<sup>1,2</sup>, Phatcharin Chotchuang<sup>1,3</sup>, Kenji Okano<sup>1</sup>, Kohsuke Honda<sup>1,#</sup>

<sup>1</sup> Synthetic Bioengineering lab, Department of Biotechnology, Graduate School of Engineering, Osaka University, Japan

<sup>2</sup> Department of Biotechnology, Faculty of Science, Mahidol University, Bangkok, Thailand

<sup>3</sup> Department of Microbiology, Faculty of Science, Chulalongkorn University, Bangkok, Thailand

# Corresponding author. E-mail address: [honda@bio.eng.osaka-u.ac.jp](mailto:honda@bio.eng.osaka-u.ac.jp)

## **Content**

### **Table**

**Table S1. Composition of chemically defined medium for *T. thermophilus***

### **Figures**

**Figure S1. Protein purification by size exclusion chromatography**

**Figure S2. Determination of kinetic parameters of TTHA0328**

**Figure S3. Confirmation of deletion of ttha0328**

**Figure S4. Determination of nicotinamidase activity in the cell lysate**

**Table S1. Composition of chemically defined medium for *T. thermophilus***

| Components                       | Final concentration |
|----------------------------------|---------------------|
| CaCl <sub>2</sub>                | 0.04 mM             |
| MgSO <sub>4</sub>                | 0.41 mM             |
| KCl                              | 1.02 mM             |
| Na <sub>2</sub> SO <sub>4</sub>  | 0.80 mM             |
| NaCl                             | 9.0 mM              |
| K <sub>2</sub> HPO <sub>4</sub>  | 2.8 mM              |
| KH <sub>2</sub> PO <sub>4</sub>  | 2.2 mM              |
| NaHCO <sub>3</sub>               | 5 mM                |
| EDTA                             | 0.04 mM             |
| Tris                             | 40 mM               |
| ferric citrate                   | 3.5 μM              |
| MnSO <sub>4</sub>                | 9.2 μM              |
| ZnSO <sub>4</sub>                | 1.9 μM              |
| Na <sub>2</sub> MoO <sub>4</sub> | 0.1 μM              |
| CoCl <sub>2</sub>                | 0.2 μM              |
| CuSO <sub>4</sub>                | 1.0 μM              |
| H <sub>2</sub> SO <sub>4</sub>   | 2.1 μM              |
| d-biotin                         | 8 μM                |
| monosodium glutamate             | 50 mM               |
| NH <sub>4</sub> Cl               | 9.5 mM              |

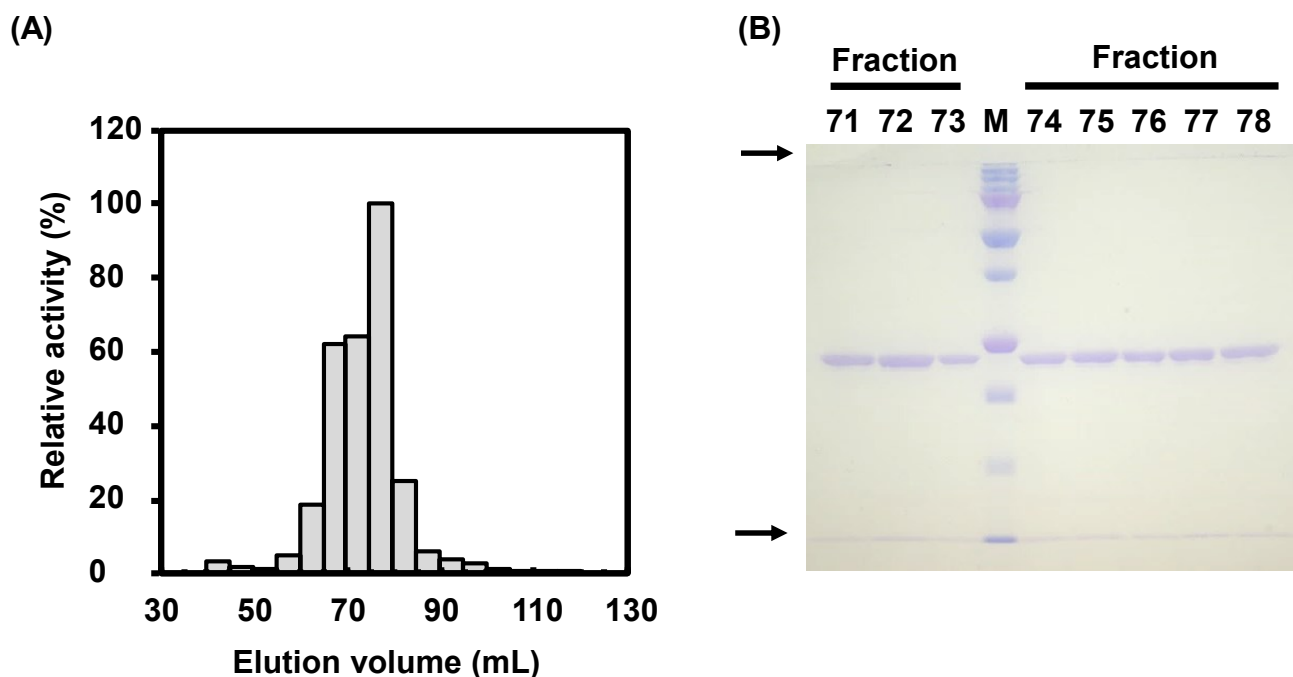

### Figure S1. Protein purification by size exclusion chromatography

(A) The activity of each fraction separated by size exclusion chromatography (gray scale bar) is shown. Five continuous fractions were pooled and the activity of pooled samples were measured (Fraction 41-45, 46-50, 51-55, 56-60, 61-65, 66-70, 71-75, 81-85, 86-90, 91-95, 96-100, 101-105, 106-110, 111-115, 116-120). The activity was normalized by the highest activity of fractions 76-80. (B) SDS-PAGE result of fractions from 71 to 78 is shown. Protein concentration of each fraction was determined by the Bradford method and 1  $\mu\text{g}$  of total protein was used for each sample. SDS-PAGE was performed with 12% of polyacrylamide with Tris-glycine SDS buffer. Precision Plus Protein™ Dual Color Standards (Bio-Rad, USA) was used as protein maker (M). The molecular weight of the band was calculated to be 23.6 kDa which is comparable to molecular weight of TTHA0328 product (22.0 KDa). The arrows indicate the start of running gel and the frontline of gel electrophoresis.

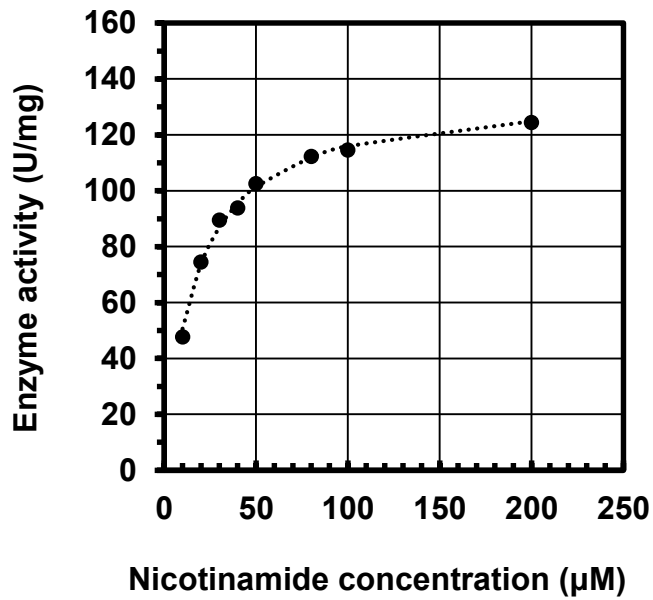

**Figure S2. Determination of kinetic parameters of TTHA0328**

Enzyme activity at different concentration of nicotinamide (10, 20, 30, 40, 50, 80, 100, 200  $\mu\text{M}$ ) was shown. The dotted line indicates the fitted Michaelis-Menten curve. The fitting was performed by the least squares method.

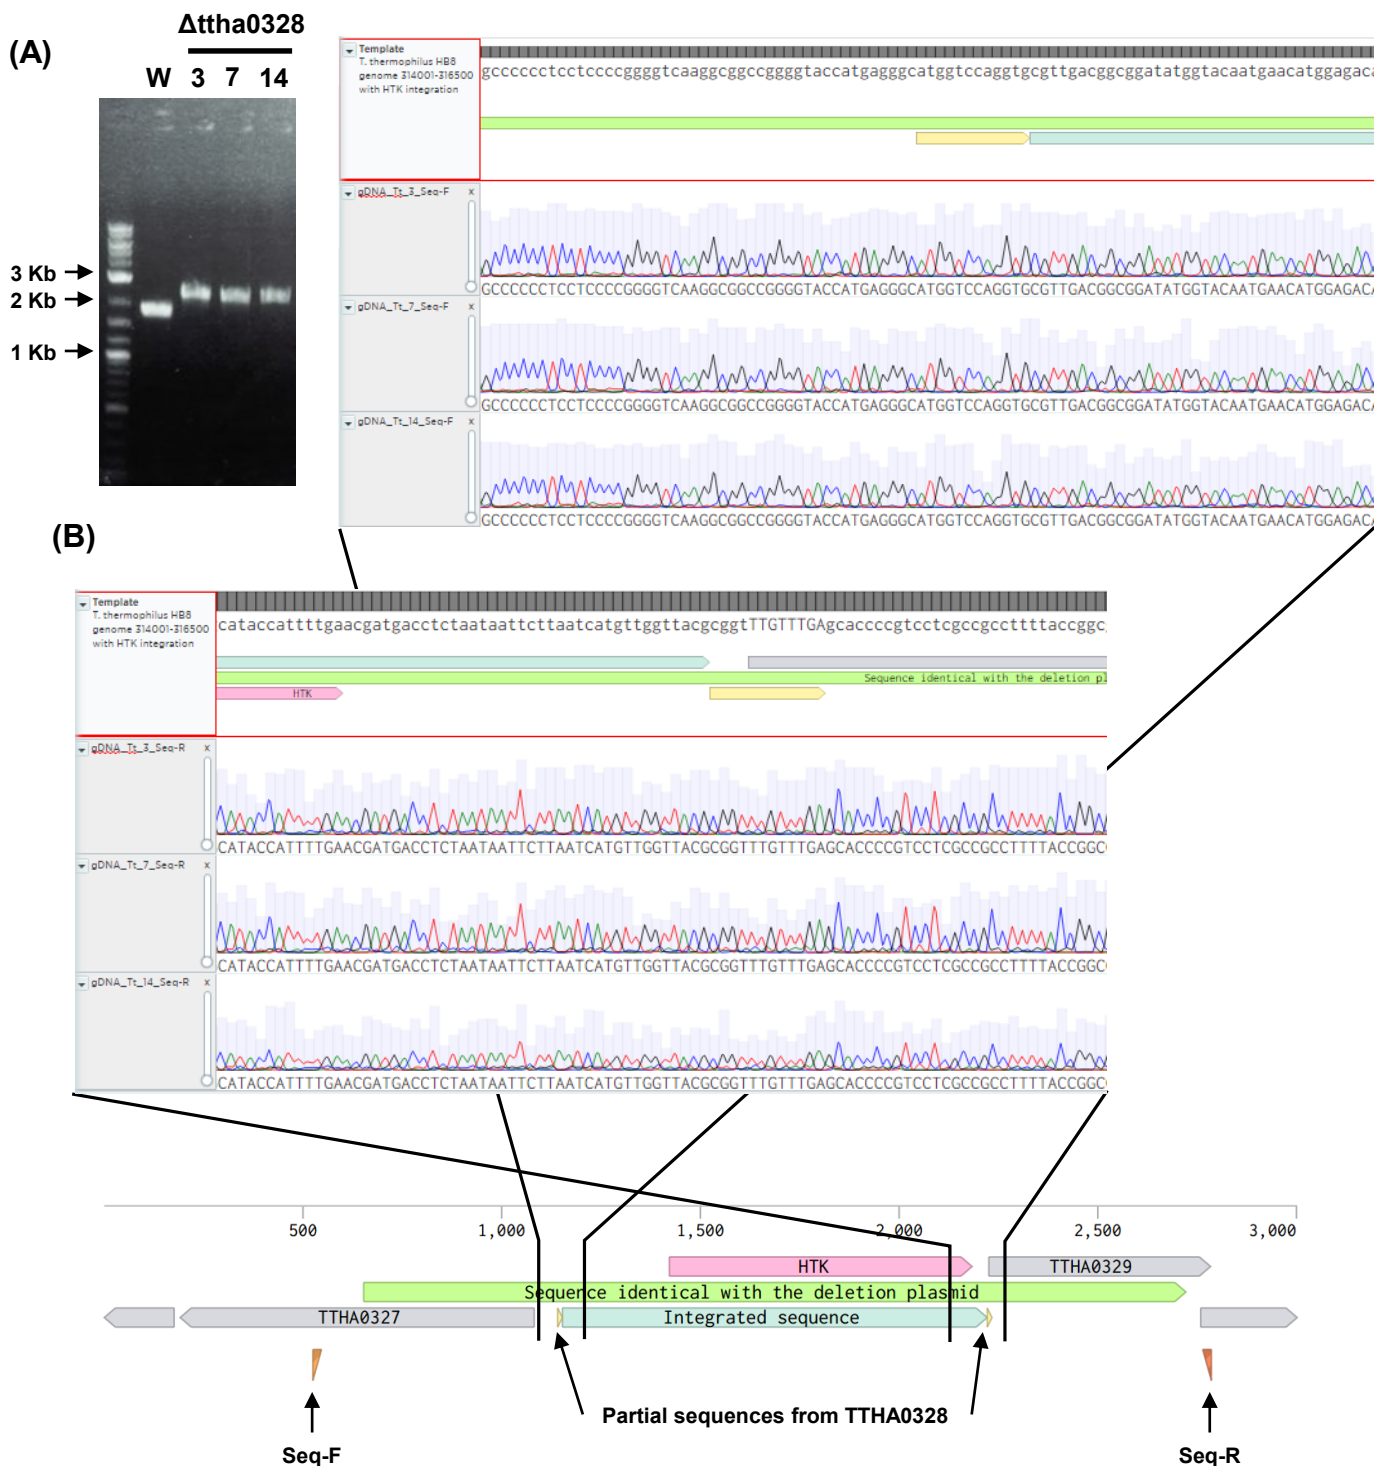

**Figure S3. Confirmation of the deletion of ttha0328**

**(A)** The integrated region in the chromosome was amplified by PCR with the oligonucleotide pairs (Seq-F/Seq-R). The genome DNAs extracted from  $\Delta$ ttha0328 strains (Colony No. 3, 7, 14) were used as templates. The genomic DNA of *T. thermophilus* wild type strain was used as control (W). The PCR products were analyzed by gel electrophoresis (Expected size, 2251 bp for the integrated fragment, 1759 bp for the native fragment). **(B)** The genome organization of  $\Delta$ ttha0328 and the part of sequence results of PCR products was visualized by Benchling (<https://benchling.com>).

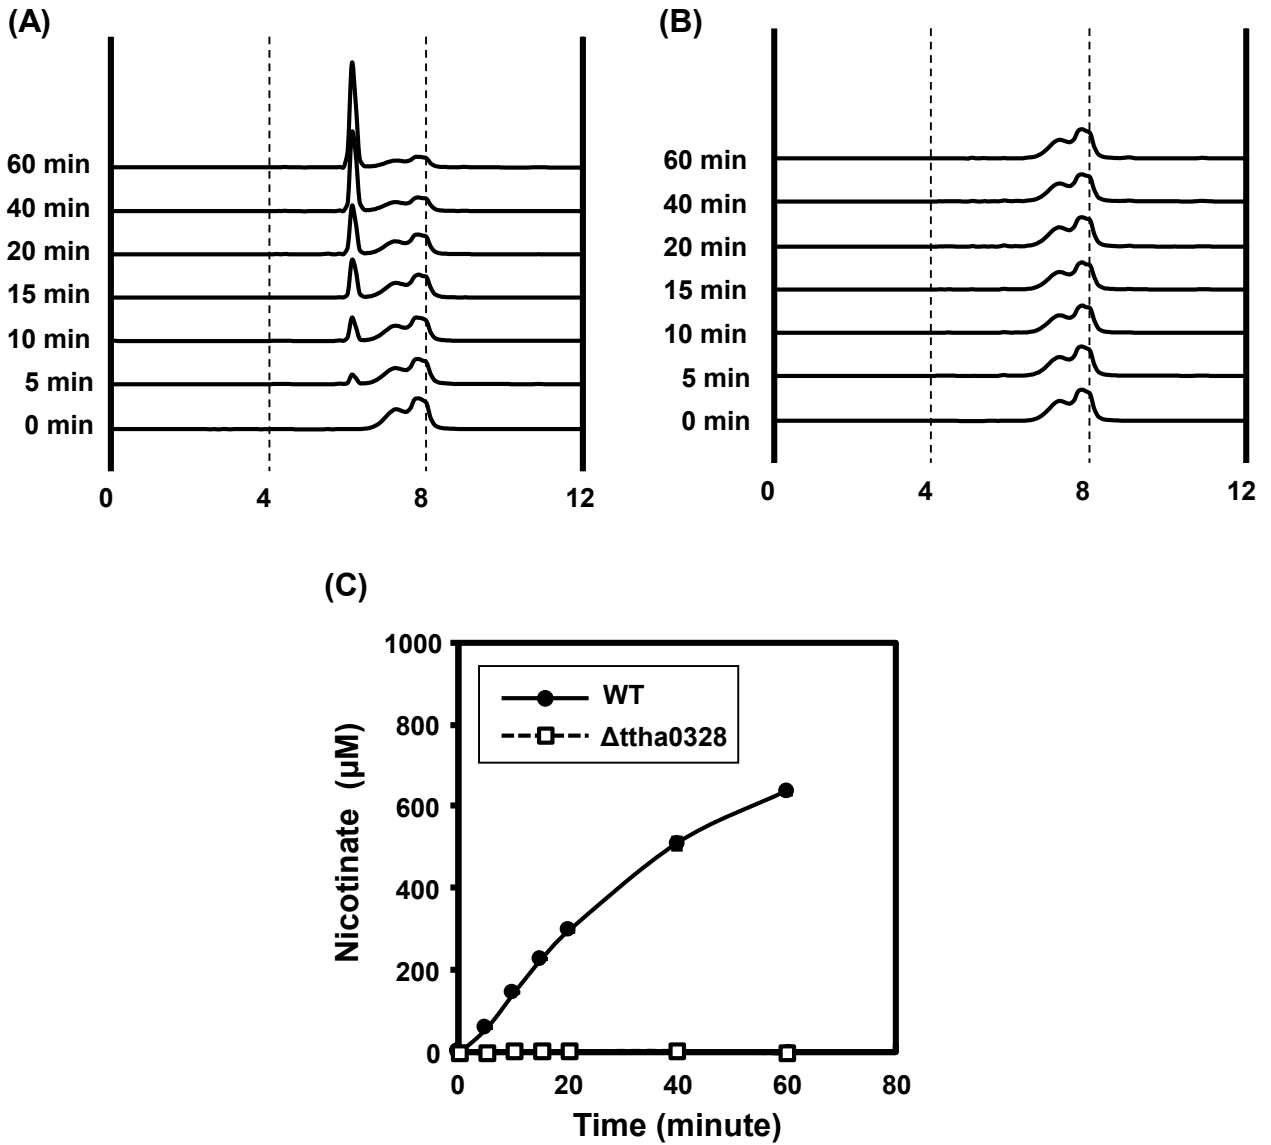

**Figure S4. Determination of nicotinamidase activity in the cell lysate**

The HPLC chromatograms of reaction mixtures with the lysates from WT (A) and  $\Delta ttha0328$  (B) at different time points are shown. Two peaks at 7.2 and 7.8 min correspond to nicotinamide and the peak at 6.1 corresponds to nicotinate. (C) Nicotinate concentration in the reaction is shown over time. The initial concentration of nicotinamide is 1 mM.
